# Supplementary material for: The European Society of Gynaecological Oncology (ESGO), the International Society for the Study of Vulvovaginal Disease (ISSVD), the European College for the Study of Vulval Disease (ECSVD) and the European Federation for Colposcopy (EFC) consensus statements on pre-invasive vulvar lesions
Source: Int J Gynecol Cancer. 2022 Jun 21;32(7):830–45. doi: 10.1136/ijgc-2021-003262 (PMC9279839; doi:10.1136/ijgc-2021-003262)
Supplement: Supplementary data [file ijgc-2021-003262supp002.xlsx]

## Sheet: VPD
First author, publication (reference)	Year of publication	Study design	N° Participants included in analysis	Number of patients/groups	Mean/median Patients age (range)	Intervention	Previously treated	Dosage imi 5%	Treatment duration	Comparison	Outcomes/Endpoints	Margin positivity	Mean/Median Follow-up duration MO (range)	Clinical response	Complete response — histology (%)	Complete response — clinical (%)	Partial response (%) [deﬁnition]	Stable disease (%)	Progression to invasion after treatment	Median time to progression to invasion (months)	Median survival (specify OS/RFS/PFS)	Underlying cancer (%)	Mean/Median Margin Size in mm (range)	LN Metastasis for Paget	Recurrence (%)	Treatment of Recurrent Disease	Median time for recurrence months (range)	Indipendent Risk Factors for Recurrence	Notes/Bias
Black [140]	2007	Retrospective cohort study	28	20/28: positive margins, 8/20: negative margins	Median 68 (48-86)	Surgical excision					Analyze the outcomes of patients with primary vulvar intraepithelial Paget's disease who had microscopically positive margins after primary excision.	20 (71%)	median 49 months (3-186)						1/14 (patients treated surgically two times)						Total recurrencies 17(%60.7). 70% (14/20) with positive margins; 38% (3/8) with negative margins.	82% (14/17) had additional surgical excision; 5.9% (1/17) had treatment with Retin-A; 11.8% (2/17) refused other treatments.	20 (3-97)
Borghi [142]	2018	Retrospective	10, 3, 3, 4	Patients developing Invasive VPD after diagnosis of in situ VPD. Patients diagnosed with mi-VPD; Patients diagnosed with i-VPD.	Median 73.5 (61-78)	1: radical vulvectomy, 1: hemivulvectomy, 1: vulvar resection. Vulvar resection. 1: radical vulvectomy + perianal resection + bilateral inguinal lymphadenectomy + pelvic lymphadenectomy, 2: hemivulvectomy + bilateral inguinal lymphadenectomy, 1: Simple vulvectomy + bilateral inguinal lymphadenectomy.					Clinical-pathological features and outcomes	100%, 100%, 50%	Mean: 57 (6-138)						100%, 66.6%	Mean: 124, Mean:133.5		50% (2/4)		66.6% (2/3), 100%	60%, 66.6% (2/3), 50% (2/4)	Local surgical or laser excision and/or photodynamic therapy	Mean: 20 (5-36), 37 (12-51), 38.5 (15-62), (5-14)
Cai [138]	2013	Retrospective cohort study	43	33 intraepithelial EMVPD; 7 invasive EMVPD; 3 with underlying sweat gland adenocarcinoma, 8 intraepithelial EMVPD. 3 EMPVD with underlying sweat gland adenocarcinoma. 7 invasive EMPVD. 25 intraepithelial EMVPD.	Mean 68.6 (52-85)	Surgical excision: 44.0% radical vulvectomy +/- lymphadenectomy; 56.0% conservative surgery (WLE, simple vulvectomy). 2 patients underwent postoperative radiotherapy. Surgical excision: 42.8% radical vulvectomy +/- lymphadenectomy; 57.2% conservative surgery (WLE, simple vulvectomy). 1 patient underwent preoperative radiotherapy and 2 patients underwent postoperative radiotherapy. Surgical excisi…					OS, DFS	47.0% (n=16), 45.8% (11/24), 42.8% (3/7), 66.7% (2/3)	54 (6-169)								Median OS for intraepithelial EMVPD 124.5 months, invasive EMVPD 70.8 months, underlying adenocarcinoma 21.3 months				34.3% (n=12: 9 superficial EMPVD, 1 invasive EMVPD and 2 with underlying adenocarcinoma), 31.8% (7/22), 20% (1/5), 33.4% (2/3), 25% (2/8)	75.0% (9) underwent repeated surgical excision and 25.0% (3) underwent RT
Dellino [214]	2021	Prospective	50 patients	25 healthy women represented the control group and 25 PVD patients	Median 72 (50.0-82.0)	All patients underwent surgery, including 4/25 (16%) local excision, 8/25 (32%) simple vulvectomy, 12/25 (48%) extended vulvectomy. On the pathological examination, 2/25 (8%) patients presented an invasive disease so a lymph-adenectomy was performed and a single inguinal lymph node involved was reported	2/25 (8%) patients performed local medical treatment (respectively imiquimod and fluorouracil) before surgery, without any benefit.					11/25(44%) had positive margins without any relationship with the extent of surgery.	6 mo																not recognized a statistically significant difference of CA-125 (P value = 0.3698) and HE4 (Pvalue = 0.1969) after surgical treatment and also comparing CA-125 of PVD patients with the control group. comparing HE4 in PVD cases with the control group, a statistically significant difference was found. ROC Curve showed low sensitivity and specificity for CA125.while the ROC curve of HE4 revealed a s…
De Magnis [139]	2013	Retrospective	34		Mean 68.7	Surgery in 100%. WLE: 61.7% (21/34), partial simple vulvectomy: 29.4% (10/34), total simple vulvectomy: 2.9% (1/34), radical vulvectomy: 5.9% (2/34)	55.9% (n= 19) previous non surgical treatments				Managment and long-term outcomes of VPD	44.1%	mean: 76.9		76.5% (26/34)							5.9% (2/34) adenocarcinoma, 11.7% (4/34) stromal invasion, 17.6			44.1% (15/34)	Surgery: WLE 86.6% (13/15), 6.6% (1/15) partial simplevulvectomy, 6.6% (1/15) total simple vulvectomy	mean: 45.7	Mutifocality, positive margins
Fontanelli [145]	2013	Prospective	32	28 intraepithelial EMVPD and 4 microinvasive EMVPD. 28 had recurrent surgically treated disease and 4 were at first diagnosis.	Mean 67.2 (48-90)	M-ALA PDT every 3 weeks for 3 course if CR reached, otherwise continued until satisfying results or progression.					Complete response, CR (lesion completely disappeared); Partial response, PR (the area decreased of at least 30% of its original size); Progressive disease, PD (the lesion increased in more than 20% of its original size); Stable disease, SD (changes between between PR and PD occurred)					9.4% (3), 3 CR	78.1% (25), 25 PR	12.5% (4), 4 SD	3% (1), 1 patient						56.3% (18), 100% (3), 60% (15) who suspended treatment after one cycle progressed	16 underwent M-ALA PDT and 2 surgical treatment. Another course of M-ALA PD. Outcome second treatment:2CR, 1PR. 13 underwent another course of M-ALA PDT, 2 underwent surgery; 10 had 12 additional courses to stabilize disease and control symptoms. Outcome M-ALA PDT: PR 61% (8), SD 49% (5). In those who had 12 additional courses 5 PR, 5 SD. Surgical treatment.	11.34 months (6-18), 11 months (4-36)
Iacoponi [209]	2016	Retrospective	38	Invasive VPD	Mean 65.2+/-11.3	Simple Vulvectomy 68% (26), Local wide excision 24% (9), Skinning 8% (3). Lymphadenectomy performed in 11% (4). Radiotherapy in in 5% (2). Chemotherapy in 3% (1).							Mean 44.1+/-35.7								Mean overall survival time 58.5 ± 0.5 months	Case load at the treating centerinversely correlated with local recurrence. Tumor size and FIGO stage were associated with the presence of distant metastases. Adjuvant therapy (radiotherapy or chemotherapy) was associated with a reduced risk of distant metastases and increased overall survival.			58% (22): 50% (19) with local recurrence and 8% (3) with distant metastasis		59.5+/-6.2: for local recurrence, the mean time to onset of recurrence 64.2 ± 7.2 months versus 44.9 ± 1.7 months for distant recurrence.
Karam [24]	2012	Retrospective	965	81.3% (781) VPD, 14.4% skin PD.	Median 72 (27-99)	88.4% (884) surgery, 4.7% (45)															Mean DSS (disease specific survival) 237.2 months							Age, advanced stage disease	The study population included both men and women and different disease localisation. Not able to stratify men and women.
Liang [212]	2021	Retrospective	38 patients	Among them, 29 patients had intraepithelial EPDV (Type 1a). 8 had intraepithelial EPDV with stromal invasion (Type 1b). and 1 had an underlying vulvar adenocarcinoma (Type 1c).	Mean 64.4 (39–79)	All patients underwent surgical resection				the risk factors of recurrence and the presence of invasive disease in patients with EPDV.			Median 61.1 (7–198) months,									including 3,8%7.8) patients who developed invasive diseases	29 intraepithelial EPDV patients.The mean lesion diameter was 4.5 cm (range, 0.5–12 cm). Microinvasive and invasive EPDV The mean lesion diameter was 4.9 cm (range, 1–8 cm). 18 out of 41 cases (43.9%) in our cohort showed positive margins, including those who underwent RV.		8 (21%) patients had 12 recurrences: noninvasive EPDV with 9 recurrences and invasive disease with 3 recurrences	we believe that a long history (more than 10 years) could be used as an indicator of the presence of invasive disease.	The first and second recurrence intervals were 62.1 (9–146) months and 22 (15–28) months,	surgical margin status	findings displayed that recurrence had no relation with EPDV type, age, lesion size, surgical margin status, and surgical procedure. However, our results showed a higher recurrence rate in patients with positive margins than those with negative margins (6/18 vs. 6/23). In conclusion, EPDV is a chronic progressive disease with a high recurrence rate irrespective of the surgical margin status. An E…
Liu [141]	2014	Retrospective	85	61.5% (40) intraepithelial VPD, 20% (13) invasive VPD, 10.8% (7) invasive VPD with underlying adenocarcinoma, 7.7% (5) intraepithelial VPD with coexisting cancer	Mean 64.4(33-82)	Out of 69 cases available: 26 simple vulvectomy (2 plus radiotherapy), 24 radical vulvectomy (18 plus inguinal lymph node dissection), 12 wide local excision (1 plus inguinal lymph node dissection), 2 partial vulvectomy, 4 radiation, 2 no treatment					To assess the clinicopathologic characteristics of patients with vulvar Paget’s disease who were ad- mitted in our hospital or of cases reported in a Chinese journal.	32.6% (15)	Mean 43.6												43.5% (20)		Mean 12.7 months	No significant relationships between margin status, lymph node involvement, pathology type, and recurrence
Louis-Sylvestre [210]	2001	Retrospective	52	Intraepithelial VPD. 31 wide local excision. 15 limited surgery +laser. 6 laser alone.	Mean 67.4 (39.6-94.7)	31 Wide local excision (2cm beyond the margin of lesion); 15 Limited surgery with peripheral laser vaporization; 6 laser vaporization alone (power of 10±12 W with a 2 mm spot). 7 Vulvectomy, 3 hemivulvectomy, others missing.					To evaluate outcome of three different conservative treatments		Mean 5.1±0.5 years (range 1-12.1 years)						0						At 1 year 31% (16); at 2 years 45% (22). At 1 year 23% (7); at 2 years 31% (9). At 1 year 33% (5); at 2 years 64% (9). At 1 year 67% (4); at 2 years 67% (4).		Mean 2.7±1 years(32.4MO). Mean 1.9±1.5 years. Mean 1±0.6 years.
Matsuo [213]	2021	Retrospective	139	Women with stage I-IV invasive vulvar Paget’s disease who received surgical treatment from2001-2010 were eligible for analysis	Median 70 (63-76)	For the surgical type, simple vulvectomy (n=64, 46.0%) was the most common surgery type followed by radical vulvectomy (n=39, 28.1%). More than half of the study patients received vulvar reconstructive surgery (n=82, 59.0%), of which a cutaneous flap was the most commonly utilized procedure (47 out of 82, 57.3%). Inguino-femoral lymphadenectomy was performed in 51 (36.7%) patients.						Women in whom the surgical margin of the vulvectomy specimen was involved by the tumor accounted for nearly one third of the study patients (positive surgical margin n=49, 35.3%). This was followed by women with surgical margin of <1cm (n=41, 29.5%).	Median 5.8 (IQR 3.5-8.6) years								There were 29 (20.9%) all-cause deaths during the follow-up, and the median time to death was 2.5 (IQR 1.3-5.2) years among those who deceased.			Tumor metastasis to the inguino-femoral lymph node chain was seen in 21 (15.1%) cases, of which themajority of nodalmetastasis wasmultiple (15 out of 21, 71.4%).	35 (25.2%) women who developed a local-recurrence, and the median time to recurrence among those. During the same follow-up, there were 20 (14.4%) women who developed distant-recurrence. positive surgical margin was significantly associated with an increased rate of local-recurrence compared to a negative surgical margin. In contrast, a positive surgical margin was not associated with an increase…		local-recurrence 1.4 (IQR 0.8-2.8) years, distant-recurrence was 1.2 (IQR 0.8-2.8) year.		a positive surgical margin was common after vulvectomy for invasive vulvar Paget’s disease (35.3%). vulvectomy type was not associated with surgical margin status. a positive surgicalmargin was associatedwith an increased risk of local-recurrence but not distant-recurrence. a positive surgical margin was ultimately associated with increased allcause mortality risk.
Shaco-Levy [211]	2010	Retrospective cohort study	56		Mean 69 (42-89)	Excision n= 54, laser ablation n= 2							Median 66 months		0.43										32%	Additional surgery	40 months (13–131 months)	Disease bilaterality, Perineum involvement
van der Linden [22]	2018	Retrospective cohort study	199, 113	Noninvasive VPD. was diagnosed in 164 patients (82 4%), microinvasive VPD in 12 (6 0%) and invasive VPD in 23 (11 6%) noninvasive VPD (ni-VPD) 77% (87), microinvasive VPD (mi-VPD) 8.8% (10), invasive VPD (i-VPD) 14.2% (16)	Median 74 (40–97), 73 (41-97)	ni-VPD: surgery 58.6% (51), Topical Imiquimod 20.7% (18), Topical others 3.6% (3), CT 1.1% (1), RT 1.1% (1), none 13.8% (12), unknown 1.1% (1). mi-VPD: surgery 100% (10). i-VPD: surgery 81.3% (13), RT 12.5% (2), none 6,2% (1).		1-5 times per week	1-12 months	the risk of developing breast, intestinal or urological malignancies in all patients. with (non)invasive VPD in comparison with the general population	To evaluate the risk of developing breast, intestinal and urological malignancies in patients with VPD compared with the general population. and in particular to focus on the risk of malignancy in patients with cutaneous noninvasive VPD. To assess clinical course, treatment schedules, and effect of invasion and tratment on recurrence and survival in patients with VPD.		The median follow-up time of all patients was 36 months (range 0–182) after VPD diagnosis. Median 38 months (0-451)	Of all patients, 27 (13 6%) were diagnosed with breast cancer, 17 (8 5%) with an intestinal malignancy and nine (4 5%) with a urological malignancy before. simultaneously with or after the diagnosis of VPD .Three patients (1 5%) had a history of two associated malignancies. ni-VPD complete 22.2% (4), partial 38.8% (7), no response/stable disease 22.2% (4) .	is generally accepted that the IHC(ımmuno histochemistry) profile of Paget cells can help to characterize different subtypes. the cutaneous phenotype is determined by a CK7+ CK20 profile, the intestinal phenotype by CK7 CK20+ CDx2+ and the urological phenotype by CK7 CK20+ and uroplakin-III+.				ni-VPD: 8%	27 patients have breast cancer,18 patients were diagnosed with breast cancer within 3–6 months prior to the VPD diagnosis. Eight of the 27 patients (30%) were diagnosed with breast cancer after their VPD diagnosis, median time 46 monthsTwo of these eight patients were diagnosed with breast cancer within 2 months after the VPD diagnosis, which was primary noninvasive in both. 17 patients have inte…					Overall 37.4%. ni-VPD: 36.8%, mi-VPD: 60%, i-VPD: 31.3%.				there is no evidence for a routine screening programme for these malignancies in. patients diagnosed with primary noninvasive VPD. The data in this study suggest promisingly that there is no statistically significant increase in cancer diagnosed in the first 3 years after primarynoninvasive VPD compared with the general population. Our main conclusion is that there is no evidence for the need for…
Bibliography
22 van der Linden M, Meeuwis KAP, Bulten J, et al. Paget disease of the vulva. Crit Rev Oncol Hematol 2016;101:60–74. doi:10.1016/j.critrevonc.2016.03.008
24 Karam A, Dorigo O. Treatment outcomes in a large cohort of patients with invasive Extramammary Paget’s disease. Gynecol Oncol 2012;125:346–51. doi:10.1016/j.ygyno.2012.01.032
138 Cai Y, Sheng W, Xiang L, et al. Primary extramammary Paget’s disease of the vulva: The clinicopathological features and treatment outcomes in a series of 43 patients. Gynecol Oncol 2013;129:412–6. doi:10.1016/j.ygyno.2013.02.029
139 De Magnis A, Checcucci V, Catalano C, et al. Vulvar paget disease: a large single-centre experience on clinical presentation, surgical treatment, and long-term outcomes. J Low Genit Tract Dis 2013;17:104–10. doi:10.1097/LGT.0b013e31826569a9
140 Black D, Tornos C, Soslow RA, et al. The outcomes of patients with positive margins after excision for intraepithelial Paget’s disease of the vulva. Gynecol Oncol 2007;104:547–50. doi:10.1016/j.ygyno.2006.09.017
141 Liu G, Yuan B, Wang Y, et al. Clinicopathologic Study of Vulvar Paget’s Disease in China. J Low Genit Tract Dis 2014;18:281–4. doi:10.1097/LGT.0b013e3182a64a58
142 Borghi C, Bogani G, Ditto A, et al. Invasive paget disease of the vulva. Int J Gynecol Cancer 2018;28:176–82. doi:10.1097/IGC.0000000000001131
145 Fontanelli R, Papadia A, Martinelli F, et al. Photodynamic therapy with M-ALA as non surgical treatment option in patients with primary extramammary Paget’s disease. Gynecol Oncol 2013;130:90–4. doi:10.1016/j.ygyno.2013.04.008
209 Iacoponi S, Zalewski K, Fruscio R, et al. Prognostic factors for recurrence and survival among patients with invasive vulvar Paget disease included in the VULCAN study. Int J Gynaecol Obstet 2016;133:76–9. doi:10.1016/j.ijgo.2015.08.018
210 Louis-Sylvestre C, Haddad B, Paniel BJ. Paget’s disease of the vulva: results of different conservative treatments. Eur J Obstet Gynecol Reprod Biol 2001;99:253–5. doi:10.1016/s0301-2115(01)00394-3
211 Shaco-Levy R, Bean SM, Vollmer RT, et al. Paget disease of the vulva: a study of 56 cases. Eur J Obstet Gynecol Reprod Biol 2010;149:86–91. doi:10.1016/j.ejogrb.2009.11.003
212 Liang S, Wang J, Wang H, et al. Clinical characteristics and risk factors of invasion in extramammary Paget’s disease of the vulva. Arch Gynecol Obstet 2021;303:541–6. doi:10.1007/s00404-020-05803-z
213 Matsuo K, Nishio S, Matsuzaki S, et al. Surgical margin status and recurrence pattern in invasive vulvar Paget’s disease: A Japanese Gynecologic Oncology Group study. Gynecol Oncol 2021;160:748–54. doi:10.1016/j.ygyno.2020.12.023
214 Dellino M, Gargano G, Tinelli R, et al. A strengthening the reporting of observational studies in epidemiology (STROBE): Are HE4 and CA 125 suitable to detect a Paget disease of the vulva? Medicine (Baltimore). 2021;100(5):e24485. doi:10.1097/MD.0000000000024485
