# Supplementary material for: The European Society of Gynaecological Oncology (ESGO), the International Society for the Study of Vulvovaginal Disease (ISSVD), the European College for the Study of Vulval Disease (ECSVD) and the European Federation for Colposcopy (EFC) consensus statements on pre-invasive vulvar lesions
Source: Int J Gynecol Cancer. 2022 Jun 21;32(7):830–45. doi: 10.1136/ijgc-2021-003262 (PMC9279839; doi:10.1136/ijgc-2021-003262)
Supplement: Supplementary data [file ijgc-2021-003262supp003.xlsx]

## Sheet: VIN
First author, publication (reference)	Year of publication	Study design	N° Participants included in analysis	Mean/median age yrs (range)	Histology	Immunosuppressed Patients	Intervention	Comparison	Outcomes/Endpoints	Margin positivity	Mean/Median Follow-up duration months (range)	Clinical response	Progression to invasion during treatment (%)	Progression to invasion after treatment	Median time to progression to invasion months (range)	Recurrence (%)	Median time for recurrence months (range)	Indipendent Risk Factors for Recurrence
Abdel-Hady [86]	2001	Prospective	32	Median 37.5 (18-70)	VIN 2/3	9.4% (3/32)	PDT (Photodynamic therapy) + ALA		To assess the immunological and viral factors associated with the response of VIN2/3 to PDT+ALA		Mean 3	31.2% (10/32)		9.4% (3/32)	12			Multifocal and pigmented lesions less prone to a complete response to PDT. HR HPV positivity, HLA I and a lack of cell-mediated immunity associated with a lack of response.
Athavale [100]	2008	Retrospective cohort	69	Mean 47 (21-79)	VHSIL 90.2% (62), dVIN 5.8% (4), Unclassifiable 4% (3)	4.3%	Surgical excision		Comparison between series for management of VIN.	Data available in 41/69 (59.4%). 75.6% (31/41)	Median 38 (6-184)	62.3%		7.2%	38 (6-184)	37.7%	32
Bradbury [101]	2016	Retrospective	96 (33 HIV+, 66 HIV-)	Median 39 (15-87), 37 HIV+ (23-47); 44 HIV- (15-87)	VHSIL 103 (96,3%) dVIN 4 (3.7%)	34.6%	Excision alone 60.7% (65), Laser ablation 8.4% (9), Excision and Laser Ablation 11.2% (12), Imiquimod 12.2% (13), Others (vulvectomy, radiotherapy, electrocauterization)7.5% (8)	HIV (+) vs HIV (-)	To review the clinical presentation of VIN, management and survival outcomes in HIV-positive women	HIV+: 39.3%, HIV- : 19%	Median 32 (12-179)	HIV (+): RFS: 42.4% PFS:69.7%; HIV (-): RFS: 71.4% PFS:95.2%		Overall 6.3%, (13.7/1000 persons-year); HIV+15.2% (29/1000 persons-year); HIV - 1.6% (3.7/1000 persons-year). Five out of six women that progressed to invasive carcinoma were HIV+.		Overall 35.4% (105.9/1000 persons-year); HIV+ 51.5% (125.4/1000 persons-year); HIV- 27% (91.7/ 1000 persons-year)		Multifocal Disease, Multicenter disease
Bruchim [102]	2007	Retrospective cohort	50	Mean 44.7 Median 45 (25-72)	VIN2/3	N/A	Surgical excision 26% (13), LEEP 28% (14), Laser excision 18% (9), Imiquimod 18% (9), No treatment 10% (5)		To evaluate the outcome of various management schemes for HPV-related VIN	N/A	Median 43.5 (12-186)	Complete response in 56% (28) and partial response in 8% (4). Complete Response Surgical excision 84.6% (11/13), LEEP 71.4% (10/14), Laser 44.5% (4/9), Imiquimod 33.3% (3/9), No treatment 0% (0/5)				Overall 32.1% (9/50), surgical excision 9.1%, LEEP 70% , Laser excision 25%, imiquimod 0%	Median 16, average time to recurrence 29+/-26.7
Fehr [103]	2013	Retrospective	411	Mean 46 (17-90)	VIN+ VaIN: 92.7% VHSIL, 7.3% vaginal/anal IN	7.1%	Surgical biopsy + CO2 evaporation in 65.7% (270), surgical excision alone in 27.7% (114), vulvectomy in 4.6% (19), photodynamic therapy or imiquimod 1.9%		Examine RF for recurrence and invasive disease		Mean 85 (13-389)			6.1% (23/377)	Mean 82 (13-290)	29.9%		Immunosuppression, multifocal disease, excision as initial treatment, smoking
Fehr [132]	2002	Prospective	21	Mean: 42.5 +/- 8.7	VIN2/3: 1 VIN2, 19 VIN3	0.2	ALA + PDT	CO2 laser evaporation or surgical excision	To detemine the feasibility of PDT of vulvar and vaginal condyloma, VIN and VaIN and to compare PDT results with conventional treatments		Mean 13 +/- 8	0.57				14.3%	Mean 6
Frega [203]	2013	Prospective	68 (32 Imiquimod arm, 36 surgery arm)	Imiquimod: mean 42.6, median 41.5; Surgery mean 40.1, median 39.5	VIN2/3; Imiquimod VIN2 18.7%, VIN3 81.3%; Surgery VIN2 39.4%, VIN3 60.6%	0	Imiquimod cream	Surgery	To compare the overall complete response, the recurrence rate and the risk factors for relapse among patients with VIN 2/3 treated with Imiquimod or surgical excision.		60	Overall complete response Imiquimod 31% (10/32), Surgery 55% (21/38)	Imiquimod: 6.3% (2/32), Surgery 8.4% (3/36)	Imiquimod 6,2% (2/32), surgery 7,9% (3/38)		Recurrence Imiquimod: 15.6% after complete response (5/32); Surgery 44.7% (17/38). Relapse (recurrence plus treatment failure) Imiquimod 68.7% (22/32); Surgery 44.7% (17/38)	Imiquimod: 25.6 +/-19; Surgery 29 +/-26	Multifocal lesion and VIN3
Frega [104]	2011	Prospective	103	Median: 39.3 (22-60)	VHSIL		CO2 Laser excision		To evaluate re-infection rate of HR-HPV and the recurrence rate of VHSIL after surgery	0% (enrollment criteria: 5 mm of free margins at surgery)	36			1% (1/103)		6.8% (7/103) at 6 months, 12.6% (13/103) at 12 months, 18.5% (19/103) at 18 months, 24.3% (25/103) at 24 months, 30.1% (31/103) at 36 months.		24/31 recurrences tested positive for HR HPV. Mean time from HPV re-infection to VIN recurrence was 18.8 months.
Gentile [105]	2014	Prospective	71 (38 surgery arm, 33 surgery+imiquimod arm)	Surgery: mean 40.1; Surgery+Imiquimod mean 41.3	VIN 2/3; Surgery arm VIN2 39.4%, VIN3 60.6%; Surgery+Imiquimod VIN2 36.4%, VIN3 63.6%	0% (excluded from enrollment)	Surgery	Surgery+Imiquimod (250mg applied 1 month after surgery, twice a week for 16 weeks)	Comparison between overall complete response, recurrence rate and RF among who had surgery or surgery + imiquimod	0% (5 mm free margins guaranteed)	60	Complete response: Surgery arm 55.2%, Surgery+Imiquimod arm 51.6%				Surgery arm 44.8%, Surgery+Imiquimod arm 48.4%	Surgery arm 29 +/- 26, Surgery+Imiquimod arm 31 +/-30	Multifocal lesions and VIN 3 before treatment are associated with higher risk of recurrence
Harvey [204]	2019	Retrospective	46	Median 53 (23-92)	VIN2/3	8.7% (4)	Imiquimod 5% three to five times weekly for 16 weeks (three patients had previous surgery)		To compare VIN disease outcome in smokers vs non smokers		60 (only 10 patients)	Overall Complete Response (CR) 61% . CR in non smokers 73%, CR in smokers 37%.				28.5% (2/7 women with at least 5 year follow up with initial complete response)
HIllemanns [205]	2000	Prospective	25	Mean 40 (22-69)	VIN1 (3), VIN2 (3), VIN3 (19)		PDT + ALA		To investigate the clinical response of PDT with the photosensitizing agent 5-aminolevulinic acid (5-ALA) in patients with vulvar intraepithelial neoplasia (VIN) grades 1 to 3.		At least 12	Complete response 52% (13), Partial response 36% (9)
Hillemanns [106]	2006	Retrospective	93	Mean 45 (19-85)	VIN1 8.6% (8), VIN2/3 91.4%; Laser Vaporization: VIN1 8.5% (4), VIN2/3 91.5% (43); PDT: VIN1 14.8% (4), VIN2/3 85.2% (23); Excision: VIN2/3 100% (12); Vulvectomy: VIN2/3 100% (7)	11.8% (11)	Laser Vaporization: 50.5% (47); PDT: 29% (27); Excision: 13% (12); Vulvectomy: 7.5% (7)		To evaluate various treatment modalities for vulvar intraepithelial neoplasia (VIN) in relation to possible risk factors for recurrence.		Mean 53.7 (24-128)			1% (1)	N/A	Overall recurrence 39.8%. Laser Vaporization: 40.4%, PDT 48.1%, Excision 41.7%, Vulvectomy 0%	12 (2-52)	VIN grade ( P = 0.02), multifocal VIN disease ( P = 0.01), multicentric intraepithelial neoplasia ( P = 0.05) and high-risk HPV infection ( P < 0.001). In multivariate analysis, only HPV status remained significant ( P = 0.012) and, if HPV testing is not available, multifocality ( P = 0.03).
Hurt [128]	2018	RCT	83 (Cidofovir arm 41, Imiquimod arm 42)	Cidofovir arm mean 50 (45-54); Imiquimod arm mean 50.5 (46-57)	VIN3	Overall 3.6%; Cidofovir arm 2%, Imiquimod arm 5%	Previously cidofovir treated complete responders	Previously imiquimod treated complete responders	To compare the recurrence rates after complete response to topical treatment with either cidofovir or imiquimod for vulval intraepithelial neoplasia (VIN) 3.		Overall median 18.4 months; Cidofovir arm median 18.2 (95% CI 17.5–19.0), Imiquimod arm median 18.8 (95% CI 17.9–20.4)					Cidofovir arm 6.0%; Imiquimod arm 28.4%		Imiquimod treatment and ﻿multifocal disease prior to treatment ﻿were associated with shorter time to new lesion in the complete responders
Jones [14]	2005	Retrospective	405	Mean 50.0 before 1980, mean 39.0 in 1980–2003	VIN 2/3	6.3%	Single treatment 52%: (212: excision only 128, 32%; laser only 72, 18%; other-5FU or imıquimode 11, 3%; unknown 1); No Treatment 63 (16%); two treatments 17% (67); three or more treatments 16% (63).		To determine the clinical characteristics, outcome following surgical treatment, and natural history of cases of untreated vulvar intraepithelial neoplasia (VIN)	75 patients (75/128 or 75 /128 + 72 ??)	215 (50%) had more than 5 years (60 mo) follow up while 102 (25%) had more than 10 years follow up			4.2%, nine cases represented treatment failure, eight cases represented new ‘‘field’’ carcinomas	Median treatment-to-invasion interval of 2.4 years in treatment failure, median initial treatment-to-invasion interval of 13.5 years in new "field" carcinomas. In untreated women mean 3.9 years (1.1-7.3 y)	50%	By the 14th year
Kesterson [107]	2009	Retrospective	31	Mean 29	VIN3	3.2% (1)	Wide local excision 42% (13), skinning vulvectomy or a partial vulvectomy 32% (10), a combination of excision with vaporization 19% (6), only laser vaporization 6% (2)		To examine the outcome of women diagnosed with vulvar intraepithelial neoplasia (VIN) 3 at less than 35 years		Mean 163 (3 weeks - 346 months)			9.7%		32%	Mean 23 (3-67)
Kushnir [108]	2013	Retrospective	29	Mean 46 (23-69)	VIN3	10% (3)	Argon Beam Coagulation		To evaluate argon beam coagulation in treating multifocal VIN III		Mean 34.9 (11.7–37.4)					48.3%	Mean 23.2
Le [206]	2006	Prospective	23 (17 evaluable)	Median 55.2 (33-77)	VIN2/3; VIN2 13% (3), VIN3 87% (20)		Imiquimod 5% cream once per week cream application for 2 weeks initially, followed by twice per week application for 2 weeks, followed by 3 times per week application, for a total treatment duration of 16 weeks		To study the tolerability and efficacy of 5% imiquimod cream in the primary treatment of vulva intraepithelial neoplasia (VIN) grade 2/3			Complete response 53% (9), Partial Response 29% (5). Complete response in VIN2 100%; Complete response in VIN3 21%, Partial response in VIN3 in 43%, Stable disease in 36%. Median time to response 7 weeks.	0	N/A
Le [131]	2007	Prospective	39 (33 evaluable)	54.5 (range 33 to 77)	VIN2/3; VIN2 8% (3), VIN3 92% (36)		Imiquimod 5% cream once per week for 2 weeks, followed by twice per week application for 2 weeks, followed by three times per week for a total treatment duration of 16 weeks	Surgery	To investigate the activity of 5% Imiquimod cream in the primary treatment of vulva intraepithelial neoplasia (VIN) grade 2/3		Median 16 (2.5-32)	Histological Complete response in 64% (21), Partial response in 27% (9). Complete response in VIN2 100%; Complete response in VIN3 60%, Partial response in VIN3 30%, Stable disease in VIN3 10%. Median time to response 7 weeks (4-12).	0			Imiquimod 20.5%, Surgery 53.5%	Median progression-free interval 31.6 for Imiquimod (95% CI 27.5–35.7), 19.4 for Surgery (95% CI 17.2–21.7)
Leufflen [109]	2013	Retrospective	50 (24 Surgery arm, 26 Laser arm)	Surgery arm mean 54.9 (16.4), Laser arm mean 39.1 (14.7)	VIN2/3: 82% (41); dVIN:18% (9). Surgery arm VIN2/3 70.8% (17), dVIN 29.2% (7), Laser arm VIN2/3 92.3% (24), dVIN 7.7% (2)	10%: Surgery arm 8.3% (2), Laser arm 11.5% (3)	Surgery (24) by cold knife or laser including partial or total vulvectomy	CO2 (26) laser vaporization	To evaluate the recurrence rate after a single treatment of vulvar intraepithelial neoplasia (VIN) with CO2 laser vaporization		Median 52.8 (9.6-221), mean 67.2	Complete response (CR) rate after 3 months of follow-up 100% in the Surgery arm and 84.6% in the Laser arm		0.02	30	21.7% among CR (2 after surgery and 8 after laser vaporization). Recurrence-free Survival (RFS) rates at 1 year 91.0% (95% CI = 68.6%-97.7%) for the surgery arm and 65.2% (95% CI = 43.7%-80.1%) for the laser arm. ﻿At 5 years, RFS 91% for the surgery arm and ﻿51.3% (95% CI = 30.1%-69.1%) for the laser arm	Mean 21.7 (95% CI = 15.1-21.3)	Current smoker, multicentric VIN, and laser vaporisation treatment
Massad [110]	2011	Prospective	3617		VIN any grade 116, VIN2+ 1.6% (58)		41 (38 HIV seropositive, 3 seronegative), had 54 vulvar treatments: 44% (24) Ablation, 39% (21) excision, 13% (7) topical therapies, 4% (2) both excision and ablation		To describe the natural history of genital warts and vulvar intraepithelial neoplasia (VIN) in women with human immunodeficiency virus (HIV)		Up to 13 years	39/61 (64%) in total		1.8% (2)	84
Mathiesen [124]	2007	RCT	31 (21 Imiquimod arm, 10 Placebo arm)	Imiquimod 46.6 (21–65), Placebo 50.3 (36–68)	VIN2/3: VIN2 6.5% (2), VIN3 93.5% (29). Imiquimod arm VIN2 4.7% (1), VIN3 95.3% (20); Placebo arm VIN2 10% (1), VIN3 90% (9)		Imiquimod 5% once a week for 2 weeks, and then twice a week the following 2 weeks, and, if tolerated, three times a week for the last 12 weeks, for a total of 16 weeks	Placebo	﻿To investigate the effect of topical imiquimod in patients with vulvar intraepithelial neoplasia (VIN)		Mean 8	Imiquimod arm Complete response (CR) 81%, Partial response (PR) 10%, Stable disease (SD) 9%. Placebo arm CR 0%, SD 100%. Women in placebo arm were offered Imiquimod: 7 chose it and 57% (4) had CR, 29% (2) PR.	0	0
Miller [111]	2002	Retrospective	37	Median 41 (23-83)	VIN2/3: VIN2 22% (8), VIN3 78% (29)	0	Cavitational Ultrasonic Surgical Aspiration (CUSA)		To investigate the use of the cavitron ultrasonic surgical aspirator (CUSA) for the treatment of vulvar intraepithelial neoplasia (VIN)		Mean 33 (minimum 7)			0.03		35%	Median 16	Recurrences were significantly (P<0.004) more frequent if VIN involved hair-bearing tissue.
Polterauer [112]	2009	Retrospective	186	Mean 51.1 (SD 15.7)	VIN2/3	2.7% (5/186)	Surgery (local wide excision or skinning vulvectomy)	preoperative biopsy vs after surgery definitive diagnosis	To assess the accuracy of preoperative vulva biopsy and the outcome of surgery in vulvar intraepithelial neoplasia (VIN) 2 and 3	57.0%		43.0%
Ribalta [207]	2018	Retrospective	46	Mean age patients with VLSIL and HIV 32.3 (16-51), with VHSIL and HIV mean 34.9 (22-47), with VLSIL and SOT mean 29 (16-38), with VHSIL and SOT mean 36.1 (21-63)	VLSIL 36.95% (17), VHSIL 63.04% (29)	100% (HIV+ or Solid Organ Transplant, SOT)	CO2 Laser Vaporization		To evalute CO2 laser vaporization in a cohort of immunodepressed women under 40 years							6.5% (3/46)
Ribeiro [113]	2012	Retrospective	29	Mean 51 (22-77)	90% VIN2/3 (26), 10% dVIN (3)	31% (9)	38% (11) CO2 laser ablation, 31% (9%) CO2 laser excision, 24% (7) local surgical excision, 3% (1) partial superficial skinning vulvectomy, 3% (1) topical treatment (5% imiquimod cream)		To evaluate effectiveness and recurrence rate of vulvar intraepithelial neoplasia (VIN) treatment according to treatment modalities		Mean 60.7 (6-192), median 35	Overall complete response 69% at 6 months follow up, 72.7% for CO2 laser ablation, 77.8% for CO2 laser excision, 57.1% for local surgical excision, 100% for vulvectomy, 0% for imiquimod				Overall 20% in complete responders, 0% for CO2 laser ablation, 28.5% for CO2 laser excision, 50% for local surgical excision,0% for vulvectomy, 0% for imiquimod	Mean 55 (13-113), median 47
Satmary [114]	2018	Retrospective	784	Median 50.1 (17.7-87.4)	VIN2/3	24.1% (189)	52.4% (411) wide local excision or excisional biopsy, 2.4% (19) vulvectomy, 19.3% (151) Laser Alone, 5.6% (44) Topical medical plus excision/laser, 1.3% (10) Topical medical alone, 1.9% (15) Excision plus laser, 17.1% (134) No treatment		To identify patient and treatment-related risk factors for recurrence and progression to cancer.	48.8% (204) among patients with excisional treatment alone	89 (3.2-206.6)			2.2% (14)	36.2 (6.5-86.8)	26.3%	Median 16.9	Age >50, Immunosupression, Metachronous VAIN or CIN
Terlou [126]	2011	Retrospective	24	Median 48 (29-64)			Previously Imiquimod 5% treated patients		To evaluate durability of clinical response to imiquimod assessed by naked eye vulvar examination and histology		Median 84.6 (67.2-99.6)	89% (8/9) complete responders remained disease free. 2 partial responders became disease free after multiple imiquimod cycle. All other partial responders had recurrencies				9% (1) among complete responders, 20% among partial responders, 100% among non responders
Sykes [115]	2002	Retrospective	65	Median 38.5 (19-86), mean 44.8	VIN3		Local excision (84%), Laser Ablation (13%), Vulvectomy (11%), Diathermy (4.8%)		To determine patient and disease characteristics, treatment patterns and long-term outcomes, in order to help direct management of patients with VIN 3, to examine the risk of development of cancer following a diagnosis of VIN 3 and the risk of recur- rent disease requiring multiple treatment episodes, and to review patients with vulval cancer, in order to establish the relative prevalence of VIN …	0.65	36.5 (0-136)			6.4%	15-109	80% over 120 months		Excision margin positive for high-grade dysplasia
Tristram [127]	2014	Prospective	180 (89 Cidofovir, 91 Imiquimod)	Median cidofovir arm 48 (42-52), median imiquimod arm 46 (41-55)	VIN3	Cidofovir arm 3%, Imiquimod arm 7%	Cidofovir 1% gel three times a week for a maximum of 24 weeks	Imiquimod 5% three times a week for a maximum of 24 weeks	To assess the activity, safety, and feasibility of two topical treatments— cidofovir and imiquimod—as an alternative to surgery in female patients with vulval intraepithelial neoplasia		Median 24.9	At post-treatment assessment visit (6 weeks after end of treatment or 6 weeks after complete response or disease progression): Complete Response (CR) for cidofovir 57% (41/72), for imiquimod 61% (42/69), Partial Response (PR) for cidofovir 19% (14/72), for imiquimod 14% (10/69), Stable Disease (SD) for cidofovir 11% (8/72), for imiquimod 9% (6/69). Complete response maintained at 12 months for ci…	For cidofovir 11% (8/72), for imiquimod 14% (10/69)
van Esch [116]	2013	Retrospective	73	Mean 43 (19-84)	uVIN: VIN2 23.3% (17), VIN3 76.7% (56)	15.1% (11)	Excision 45.2% (33), laser 34.2% (25), excision+laser 12.3%(9), imiquimod 5% cream 8.2% (6)		To identify clinical characteristics associated with recurrence and progression in patients with usual vulvar intraepithelial neoplasia (uVIN)	46% (29/63)	Median 49, mean 77.1 (0-307)	84.3% after excision, 77.1% after laser, 42.9% after imiquimod, 69.2% after combined laser and excision		15.1% (11)	71.5 (9-259)	Overall recurrence: 50.7%. Recurrence after excision 45.2%, after laser 34.2%, after imiquimod 8.2%, after laser and excision 12.3%	Overall median time to recurrence 14 (1-168). Median time to recurrence after Excision of 41.5 months, after Laser therapy of 7.5 months, Imiquimod of 13 months, and after Laser and Excision of 6 months	Multifocality of lesion
Van Seters [125]	2008	RCT	52 (26 Imiquimod arm, 26 Placebo arm)	Median Imiquimod arm 39 (22-56), median Placebo arm 44 (31-71)	VIN1 2% (1), VIN2 8% (4),VIN3 90% (47). Imiquimod arm VIN1 4% (1), VIN2 8% (2), VIN3 88% (23); Placebo arm VIN2 8% (2), VIN3 92% (24)		Imiquimod 5% 250mg twice a week for 16 weeks	Placebo	To investigate the effectiveness of imiquimod 5% cream for the treatment of vulvar intraepithelial neoplasia (VIN)		12	At 20 weeks in Imiquimod arm: 35% (9) complete response (100% reduction), 19% (5) strong partial response (76 to 99% reduction),27% (7) weak partial response (26 to 75% reduction); in Placebo arm: 100% (26) no response (reduction in lesion size of 25% or less). At 12 months in Imiquimod arm: 35% (9) complete response, 15% (4) strong partial response, 23% (6) weak partial response 23%; in Placebo …		0.06	7
Vlastos [117]	2002	Retrospective	74	44.5 (23-72)	VIN: VIN1 4% (3), VIN2/3 66% (49), Vulvar carcinoma in situ 30% (22)		Excluding previously treated patients, LEEP (n=20), Wide Local Excision (n=22), Laser (n=20)		To compare by response rate the therapeutic options of loop electrosurgical excision procedure (LEEP), laser therapy, and wide local excision in managing high-grade vulvar intraepithelial neoplasia	LEEP 15% (3/20), Wide Local Excision 9% (2/22) Laser N/A	Median 37 (1-175)	Complete response in 85% (17/20) LEEP, in 77% (17/22) Wide Local Excision, in 50% (10/20) Laser.				Overall recurrence 24.2%; 15% (3/20) in LEEP, 9% (2/22) in Wide Local Excision, 50% (10/20) in Laser	16 in LEEP, 15 in Wide Local Excison, 25 in Laser
Von Gruenigen [118]	2007	RCT	96 (51 CO2 laser arm, 45 CUSA)	Mean 48.5 (18–82)	VIN+VaIN: 44 VIN, VIN1 32% (14/44), VIN2/3 68% (30/44). CO2 laser arm VIN1 33% (8/24), VIN2/3 67% (16/24); CUSA arm VIN1 30% (6/20), VIN2/3 70% (14/20)		Carbon dioxide laser surgery (CO2 laser)	Cavitron Ultrasonic Surgical Aspirator (CUSA)	To compare pain, adverse effects and recur- rence of dysplasia in patients with vaginal intraepithelial neoplasia or vulvar intraepithelial neoplasia prospectively treated by carbon dioxide laser or ultrasonic surgical aspiration		12	74.5% CO2 laser arm, 75.6% CUSA arm				25.5% CO2 laser arm, 24.4% CUSA arm. Overall recurrence in VIN 36.4% (16/44)		Age
Wallbillich [119]	2012	Retrospective	303	Median 47.3 (14.1-87.2)	VIN2/3	8.9% (27)	59% (176/303) excision, 13% (40/303) laser ablation, 7.4% (22/303) imiquimod, 8.1% (24/303) excision with laser ablation, 3.4% (10/303) excision with imiquimod		To determine risk factors for the development of vulvar intraepithelial neoplasia (VIN 2/3), and factors associated with recurrence	62.6% (92/147) of patients treated with excision	21 (0-340)			2.3%	109 (12–327)	28.7% from primary diagnosis. Excision 26.4%, Laser 41.9%, Imiquimod 13.6%, Excision+laser 50.0%, Excision+imiquimod 10.0%, Laser+imiquimod 0.0%	Median 25 (1.6–326)	Smoking, larger lesion size, and positive margins
Westermann [130]	2013	Retrospective	62	Median 51 (22-89)	VIN1 10% (6), VIN2 22.6% (14) VIN3 67.7% (42)		Imıquımod 5% cream once a week, after partial remission and, depending on the local inflammatory response, the application frequency was increased to 2–3 times a week		To assess the efficacy of 5% imiquimod cream for treating vulvar intraepithelial neoplasia (VIN)		21 (3-72)	76% (47) Complete response, 19% (12) Partial response (more than 50% lesion reduction), 3% (2) Weak partial response (more than 25% lesion reduction)				27% (17/62)
Winters [208]	2008	Prospective	20	Mean 45.5	VIN2/3: VIN2 15% (3), VIN3 85% (17/20)		Imiquimod applied to the vulval skin once in the first week, twice in the second week, and three times for six subsequent weeks. Two PDT treatments were carried out at week 12 and 16.		To assess clinical and immunological response of sequential imiquimod and Photodynamic therapy for treatment of VIN		Mean 13	At 26 weeks, 20% (4) complete responses, 40% (8) partial responses, 40% (8) with stable disease. At 52 weeks, 30% (6) complete response, 25% (5) partial response, and 40% (8) stable disease.				0.05
Yu [120]	2014	Retrospective	64	Mean 40.6 +/- 12.5, median 39 (13-65)	uVIN		81% (52) wide local excision, 19% (12) simple vulvectomy			15.4% WLE, 16.7% simple vulvectomy	8.6 +/- 7.5 (1-43)					Overall 6.25%, 9.1% for WLE and 0% for simple vulvectomy.
Zawislak [121]	2006	Retrospective	90	Mean 50 (19–85)	VIN1 13% (12), VIN2 11% (10), VIN3 73% (66), VIN not classified 2% (2)		54% (49) Surgery (45 local excision, 4 vulvectomy), 22% (20) topical steroid preparation and 14 of them underwent subsequent surgery, 4% (4) 5-fluorouracil followed by surgery, 13% (12) miscellaneous				12-156			20% (18/90)
Zawislak [133]	2009	Prospective	23	Mean 45 (30-79)	VIN2/3: VIN2 12% (3/25), VIN3 88% (22/25)		Novel bioadhesive patch, of dimensions 3×5 cm, Poly(methylvinylether/maleic anhydride) (PMVE/MA) copolymer was used as a bioadhesive matrix platform and vehicle for the delivery of ALA. A bioadhesive patch was prepared, consisting of a bioadhesive layer cast from an aqueous blend of 20% (w/w) Gantrez® AN-139, (PMVE/MA) with 10% (w/w) tripropyleneglycol methyl ether (DowanolTM, TPM) as plasticiser…		To assess photodynamic treatment (PDT) as a treatment method for vulval intraepithelial neoplasia (VIN) using a novel bioadhesive patch to deliver aminolevulinic acid		1.5	At 6 weeks post treatment 36% (9/24) complete hystological response		0
Bibliography
14 Jones RW, Rowan DM, Stewart AW. Vulvar intraepithelial neoplasia: aspects of the natural history and outcome in 405 women. Obstet Gynecol 2005;106:1319–26. doi:10.1097/01.AOG.0000187301.76283.7f
86 Abdel-Hady ES, Martin-Hirsch P, Duggan-Keen M, et al. Immunological and viral factors associated with the response of vulval intraepithelial neoplasia to photodynamic therapy. Cancer Res 2001;61:192–6.http://www.ncbi.nlm.nih.gov/pubmed/11196160
100 Athavale R, Naik R, Godfrey KA, et al. Vulvar intraepithelial neoplasia-The need for auditable measures of management. Eur J Obstet Gynecol Reprod Biol 2008;137:97–102. doi:10.1016/j.ejogrb.2007.02.009
101 Bradbury M, Cabrera S, García-Jiménez A, et al. Vulvar intraepithelial neoplasia: Clinical presentation, management and outcomes in women infected with HIV. Aids 2016;30:859–67. doi:10.1097/QAD.0000000000000984
102 Bruchim I, Gotlieb WH, Mahmud S, et al. HPV-related vulvar intraepithelial neoplasia: Outcome of different management modalities. Int J Gynecol Obstet 2007;99:23–7. doi:10.1016/j.ijgo.2007.03.023
103 Fehr MK, Baumann M, Mueller M, et al. Disease progression and recurrence in women treated for vulvovaginal intraepithelial neoplasia. J Gynecol Oncol 2013;24:236–41. doi:10.3802/jgo.2013.24.3.236
104 Frega A, Sopracordevole F, Scirpa P, et al. The re-infection rate of high-risk HPV and the recurrence rate of vulvar intraepithelial neoplasia (VIN) usual type after surgical treatment. Med Sci Monit 2011;17:CR532–5. doi:10.12659/MSM.881941
105 Gentile M, Bianchi P, Sesti F, et al. Adjuvant topical treatment with imiquimod 5% after excisional surgery for VIN 2/3. Eur Rev Med Pharmacol Sci 2014;18:2949–52.http://www.ncbi.nlm.nih.gov/pubmed/25339491
106 Hillemanns P, Wang X, Staehle S, et al. Evaluation of different treatment modalities for vulvar intraepithelial neoplasia (VIN): CO2 laser vaporization, photodynamic therapy, excision and vulvectomy. Gynecol Oncol 2006;100:271–5. doi:10.1016/j.ygyno.2005.08.012
107 Kesterson JP, Lele S. Vulvar intraepithelial neoplasia 3 in women less than 35 years. J Low Genit Tract Dis 2009;13:196–9. doi:10.1097/LGT.0b013e318196bd23
108 Kushnir CL, Fleury AC, Hill MC, et al. The use of argon beam coagulation in treating vulvar intraepithelial neoplasia III: A retrospective review. Gynecol Oncol 2013;131:386–8. doi:10.1016/j.ygyno.2013.06.006
109 Leufflen L, Baermann P, Rauch P, et al. Treatment of vulvar intraepithelial neoplasia with CO(2) laser vaporization and excision surgery. J Low Genit Tract Dis 2013;17:446–51. doi:10.1097/LGT.0b013e318284c1ed
110 Massad LS, Xie X, Darragh T, et al. Genital warts and vulvar intraepithelial neoplasia: Natural history and effects of treatment and human immunodeficiency virus infection. Obstet Gynecol 2011;118:831–9. doi:10.1097/AOG.0b013e31821a0f4d
111 Miller BE. Vulvar intraepithelial neoplasia treated with cavitational ultrasonic surgical aspiration. Gynecol Oncol 2002;85:114–8. doi:10.1006/gyno.2001.6577
112 Polterauer S, Catharina Dressler A, Grimm C, et al. Accuracy of preoperative vulva biopsy and the outcome of surgery in vulvar intraepithelial neoplasia 2 and 3. Int J Gynecol Pathol 2009;28:559–62. doi:10.1097/PGP.0b013e3181a934d4
113 Ribeiro F, Figueiredo A, Paula T, et al. Vulvar intraepithelial neoplasia: evaluation of treatment modalities. J Low Genit Tract Dis 2012;16:313–7. doi:10.1097/LGT.0b013e3182410544
114 Satmary W, Holschneider CH, Brunette LL, et al. Vulvar intraepithelial neoplasia: Risk factors for recurrence. Gynecol Oncol 2018;148:126–31. doi:10.1016/j.ygyno.2017.10.029
115 Sykes P, Smith N, McCormick P, et al. High-grade vulval intraepithelial neoplasia (VIN 3): a retrospective analysis of patient characteristics, management, outcome and relationship to squamous cell carcinoma of the vulva 1989-1999. Aust New Zeal J Obstet Gynaecol 2002;42:75–80. doi:10.1111/j.0004-8666.2002.00075.x
116 Van Esch EMG, Dam MCI, Osse MEM, et al. Clinical characteristics associated with development of recurrence and progression in usual-type vulvar intraepithelial neoplasia. Int J Gynecol Cancer 2013;23:1476–83. doi:10.1097/IGC.0b013e3182a57fd6
117 Vlastos A-T, Levy LB, Malpica A, et al. Loop electrosurgical excision procedure in vulvar intraepithelial neoplasia treatment. J Low Genit Tract Dis 2002;6:232–8. doi:10.1097/00128360-200210000-00008
118 von Gruenigen VE, Gibbons HE, Gibbins K, et al. Surgical treatments for vulvar and vaginal dysplasia: a randomized controlled trial. Obstet Gynecol 2007;109:942–7. doi:10.1097/01.AOG.0000258783.49564.5c
119 Wallbillich JJ, Rhodes HE, Milbourne AM, et al. Vulvar intraepithelial neoplasia (VIN 2/3): comparing clinical outcomes and evaluating risk factors for recurrence. Gynecol Oncol 2012;127:312–5. doi:10.1016/j.ygyno.2012.07.118
120 Gu Y, Zhu L, Li X, et al. Surgical treatment of usual type vulvar intraepithelial neoplasia: a study at three academic hospitals. Chin Med J (Engl) 2014;127:784–6. doi:10.3760/cma.j.issn.0366-6999.20131816
121 Zawislak AA, Price JH, Dobbs SP, et al. Contemporary experience with the management of vulval intraepithelial neoplasia in Northern Ireland. Int J Gynecol Cancer 2006;16:780–5. doi:10.1111/j.1525-1438.2006.00375.x
124 Mathiesen O, Buus SK, Cramers M. Topical imiquimod can reverse vulvar intraepithelial neoplasia: A randomised, double-blinded study. Gynecol Oncol 2007;107:219–22. doi:10.1016/j.ygyno.2007.06.003
125 van Seters M, van Beurden M, ten Kate FJW, et al. Treatment of vulvar intraepithelial neoplasia with topical imiquimod. N Engl J Med 2008;358:1465–73. doi:10.1056/NEJMoa072685
126 Terlou A, Van Seters M, Ewing PC, et al. Treatment of vulvar intraepithelial neoplasia with topical imiquimod: Seven years median follow-up of a randomized clinical trial. Gynecol Oncol 2011;121:157–62. doi:10.1016/j.ygyno.2010.12.340
127 Tristram A, Hurt CN, Madden T, et al. Activity, safety, and feasibility of cidofovir and imiquimod for treatment of vulval intraepithelial neoplasia (RT3VIN): A multicentre, open-label, randomised, phase 2 trial. Lancet Oncol 2014;15:1361–8. doi:10.1016/S1470-2045(14)70456-5
128 Hurt CN, Jones SEF, Madden TA, et al. Recurrence of vulval intraepithelial neoplasia following treatment with cidofovir or imiquimod: results from a multicentre, randomised, phase II trial (RT3VIN). BJOG An Int J Obstet Gynaecol 2018;125:1171–7. doi:10.1111/1471-0528.15124
130 Westermann C, Fischer A, Clad A. Treatment of vulvar intraepithelial neoplasia with topical 5% imiquimod cream. Int J Gynaecol Obstet 2013;120:266–70. doi:10.1016/j.ijgo.2012.09.020
131 Le T, Menard C, Hicks-Boucher W, et al. Final results of a phase 2 study using continuous 5% Imiquimod cream application in the primary treatment of high-grade vulva intraepithelial neoplasia. Gynecol Oncol 2007;106:579–84. doi:10.1016/j.ygyno.2007.05.019
132 Fehr MK, Hornung R, Degen A, et al. Photodynamic therapy of vulvar and vaginal condyloma and intraepithelial neoplasia using topically applied 5-aminolevulinic acid. Lasers Surg Med 2002;30:273–9. doi:10.1002/lsm.10048
133 Zawislak A, Donnelly RF, McCluggage WG, et al. Clinical and immunohistochemical assessment of vulval intraepithelial neoplasia following photodynamic therapy using a novel bioadhesive patch-type system loaded with 5-aminolevulinic acid. Photodiagnosis Photodyn Ther 2009;6:28–40. doi:10.1016/j.pdpdt.2009.03.004
203 Frega A, Sesti F, Sopracordevole F, et al. Imiquimod 5% cream versus cold knife excision for treatment of VIN 2/3: a five-year follow-up. Eur Rev Med Pharmacol Sci 2013;17:936–40.http://www.ncbi.nlm.nih.gov/pubmed/23640441
204 Harvey G, Pontefract D, Hughes BR, et al. Impact of smoking on imiquimod response in patients with vulval intraepithelial neoplasia. Clin Exp Dermatol 2019;44:e140–4. doi:10.1111/ced.13874
205 Hillemanns P, Untch M, Dannecker C, et al. Photodynamic therapy of vulvar intraepithelial neoplasia using 5-aminolevulinic acid. Int J cancer 2000;85:649–53. doi:10.1002/(sici)1097-0215(20000301)85:5<649::aid-ijc9>3.0.co;2-e
206 Le T, Hicks W, Menard C, et al. Preliminary results of 5% imiquimod cream in the primary treatment of vulva intraepithelial neoplasia grade 2/3. Am J Obstet Gynecol 2006;194:377–80. doi:10.1016/j.ajog.2005.08.022
207 Ribalta JCL, Mateussi MV, Speck NM de G. Therapeutic Assessment of Vulvar Squamous Intraepithelial Lesions with CO2 Laser Vaporization in Immunosuppressed Patients. Rev Bras Ginecol Obstet 2018;40:26–31. doi:10.1055/s-0037-1618573
208 Winters U, Daayana S, Lear JT, et al. Clinical and immunologic results of a phase II trial of sequential imiquimod and photodynamic therapy for vulval intraepithelial neoplasia. Clin Cancer Res 2008;14:5292–9. doi:10.1158/1078-0432.CCR-07-4760
